# Supplementary material for: Characterizations and environmental impacts of exhaust of non-road vehicles
Source: Research Square preprint supplement (doi:10.21203/rs.3.rs-2425479/v1), 2023-01-17
Supplement: Supplementary file 1 [file 6dd533efb8fca4d79b69da49.docx]

**Characterizations and environmental impacts of exhaust of non-road vehicles**

**Hsing-Wang Li1, Chia-Hsiang Lai2, Yi-Ching Lin3, Po-Yen Chien3, Wei-Hsiang Chen3,4**, **Yen-Ping Peng3,4＊**

1Green Energy & System Integration Research & Development Department, China Steel Corporation, Kaohsiung, Taiwan

2Department of Biotechnology, National Formosa University, Yunlin, Taiwan

3Institute of Environment Engineering, National Sun Yat-sen University, Kaohsiung, Taiwan

4Aerosol Science and Research Center, National Sun Yat-sen University, Kaohsiung, Taiwan

**Supporting Information**


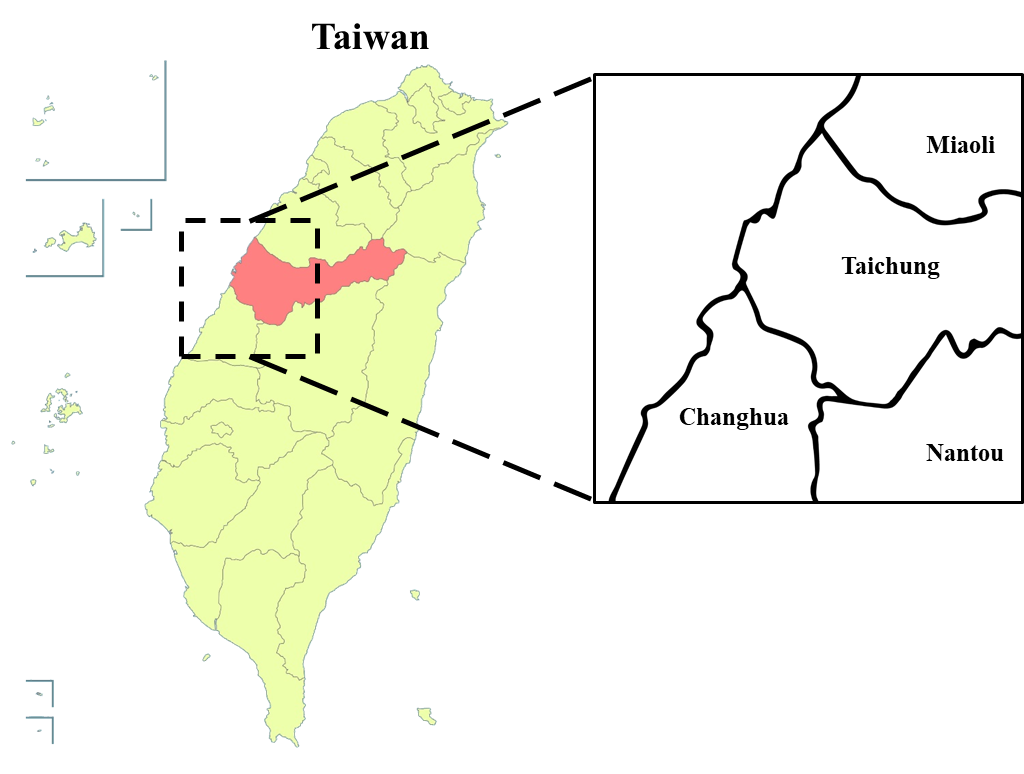


Figure S1. model domain


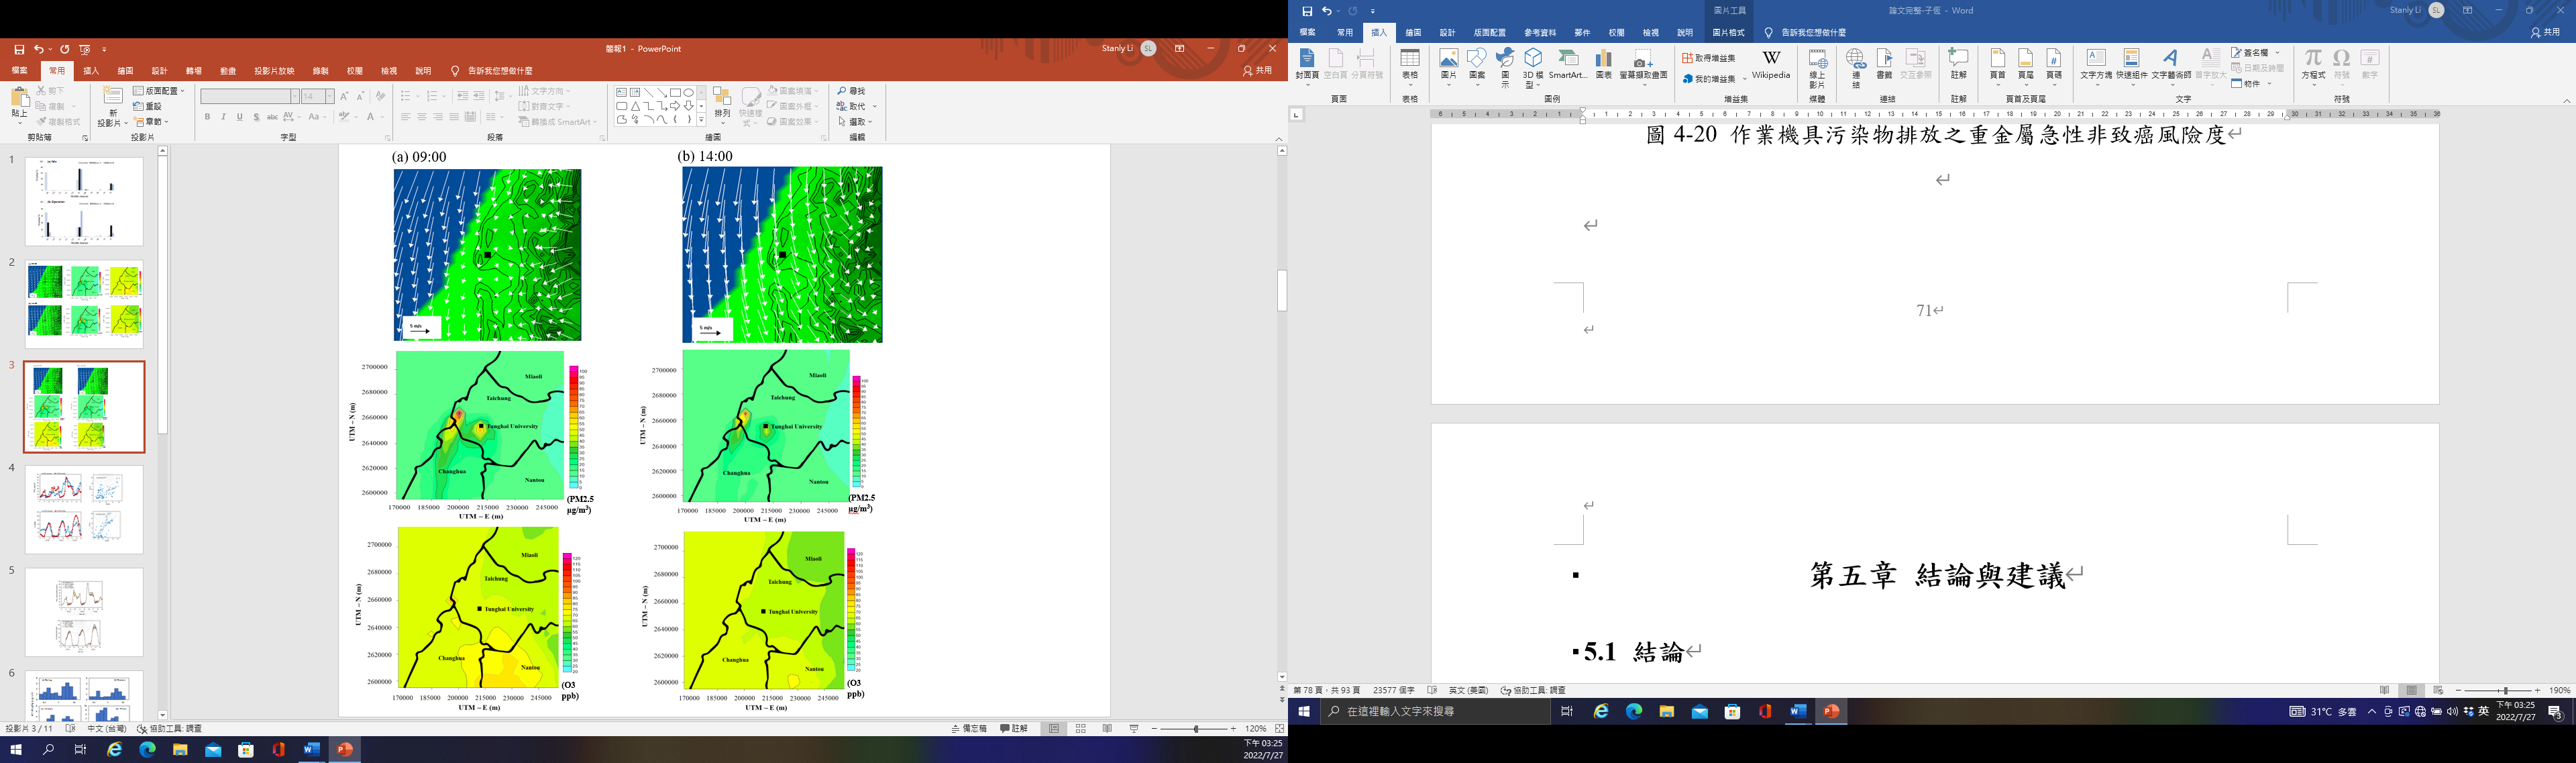


Figure S2. Simulated surface wind vectors and PM2.5 concentration contour (ug/m3) on November 29 in 2018 at (a) 09:00, and (b) 14:00


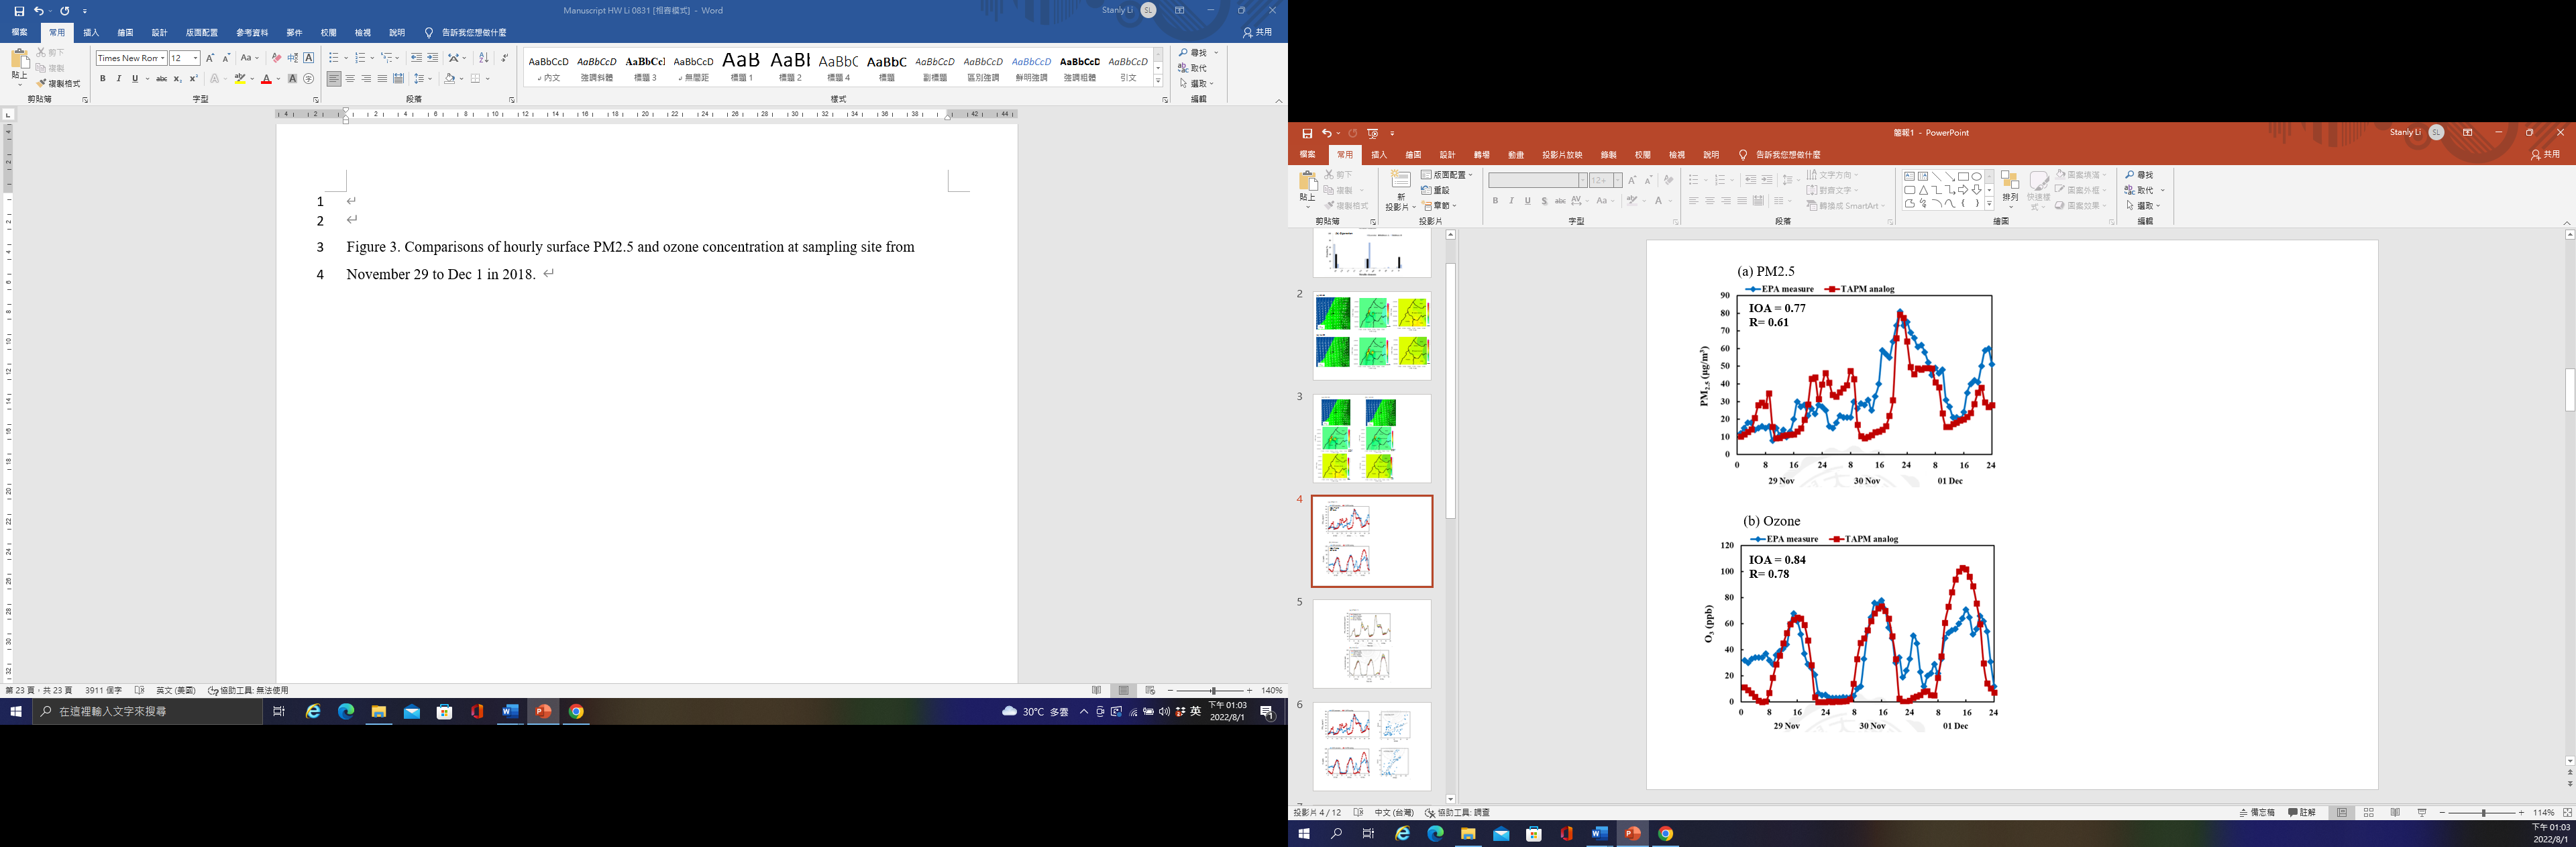


Figure S3. Comparisons of hourly surface PM2.5 concentration at sampling site from November 29 to Dec 1 in 2018.
